# Supplementary material
Source: publisher figshare collection journal article supplement (https://acs.figshare.com/ndownloader/files/20049488)
Supplement: Supplementary file 1 [file 20049488]

## **Supporting Information**

### Molten Salt Hydrates in the Synthesis of TiO<sub>2</sub> flakes

Trang Q. Tran<sup>†</sup>, Weiqing Zheng<sup>§</sup> and George Tsilomelekis<sup>†,\*</sup>

<sup>†</sup>Department of Chemical and Biochemical Engineering, Rutgers, The State University of New Jersey, Piscataway, 08854, NJ

<sup>§</sup>Catalysis Center for Energy Innovation and Department of Chemical and Biomolecular Engineering University of Delaware Newark, DE 19716 (USA)

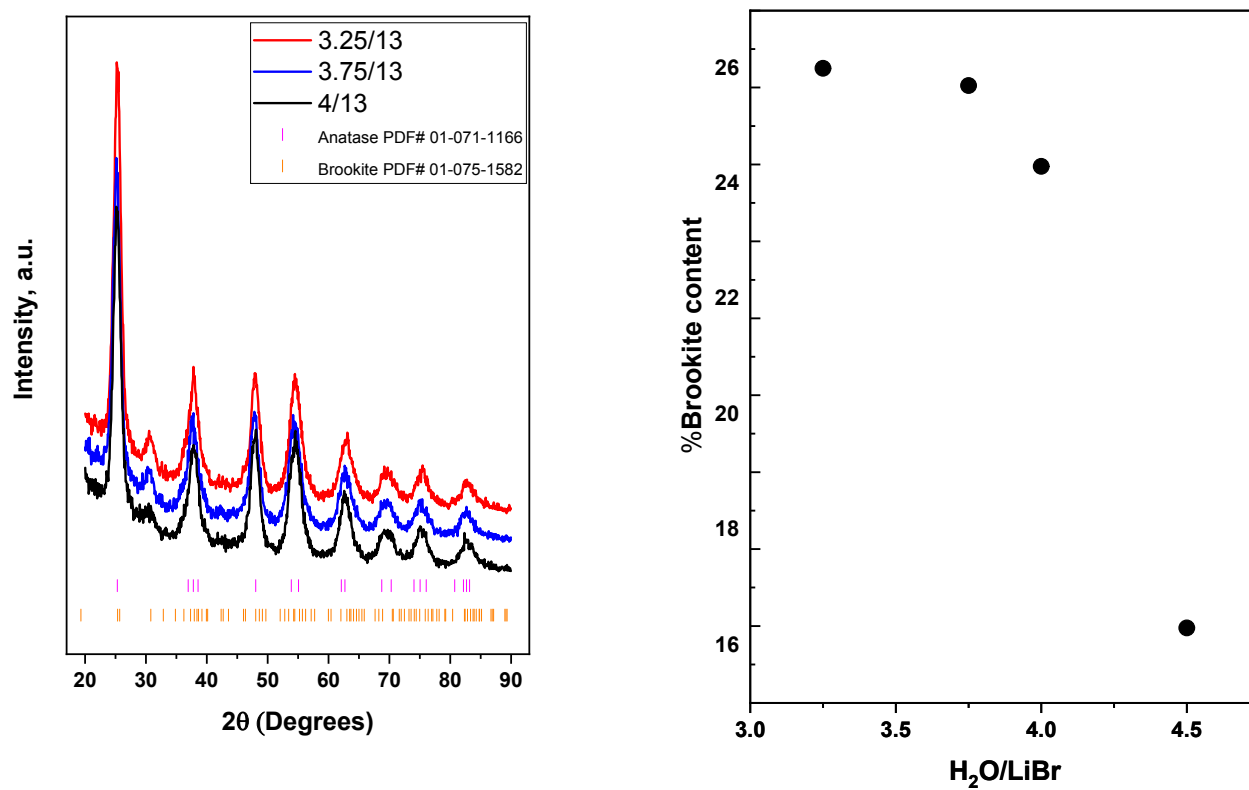

**Figure S1:** XRD patterns (Left) of synthesized TiO samples. (B) indicates the presence of Brookite crystalline phase. Relevant analysis (Right) of the brookite content

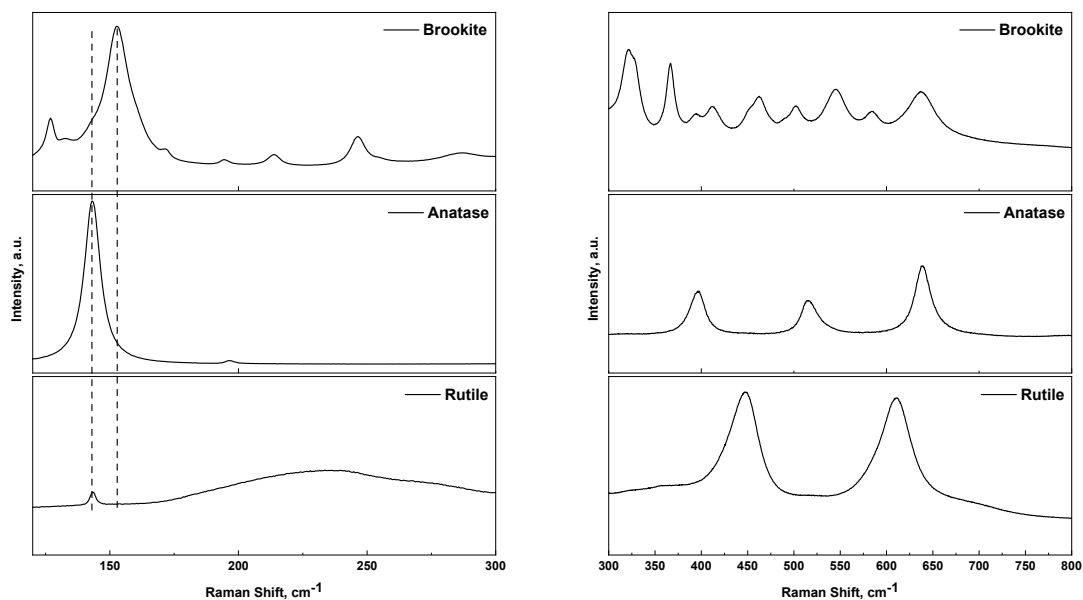

**Figure S2:** Raman Spectra of commercial highly crystalline Brookite, Anatase and Rutile  $\text{TiO}_2$

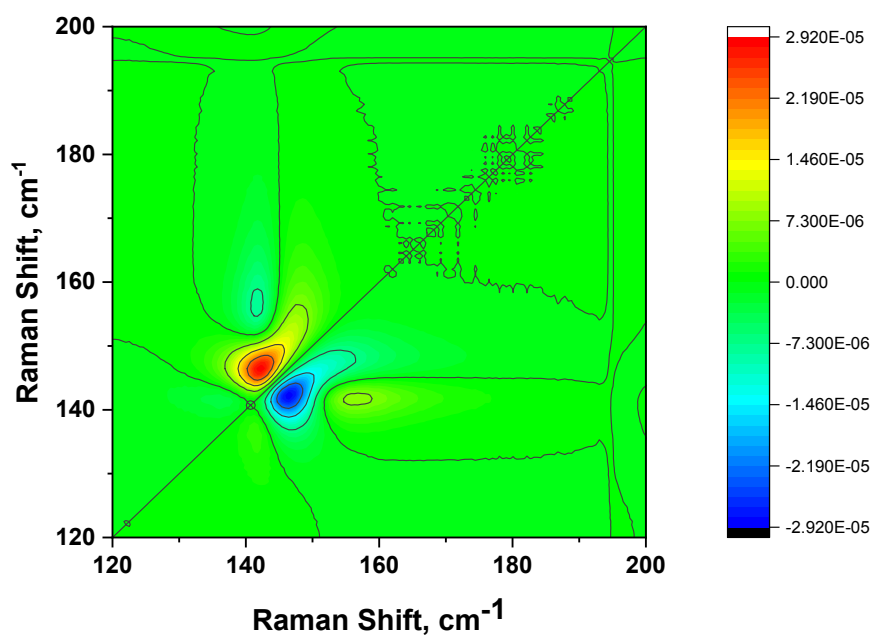

**Figure S3:** asynchronous 2D-Raman maps of the titanium dioxide synthesized as a function of temperature. The temperature range that used for the generation of the 2D-Raman maps was 25-600°C. The correlation spectra were developed by utilizing the 2D application available in the Origin2019b software.

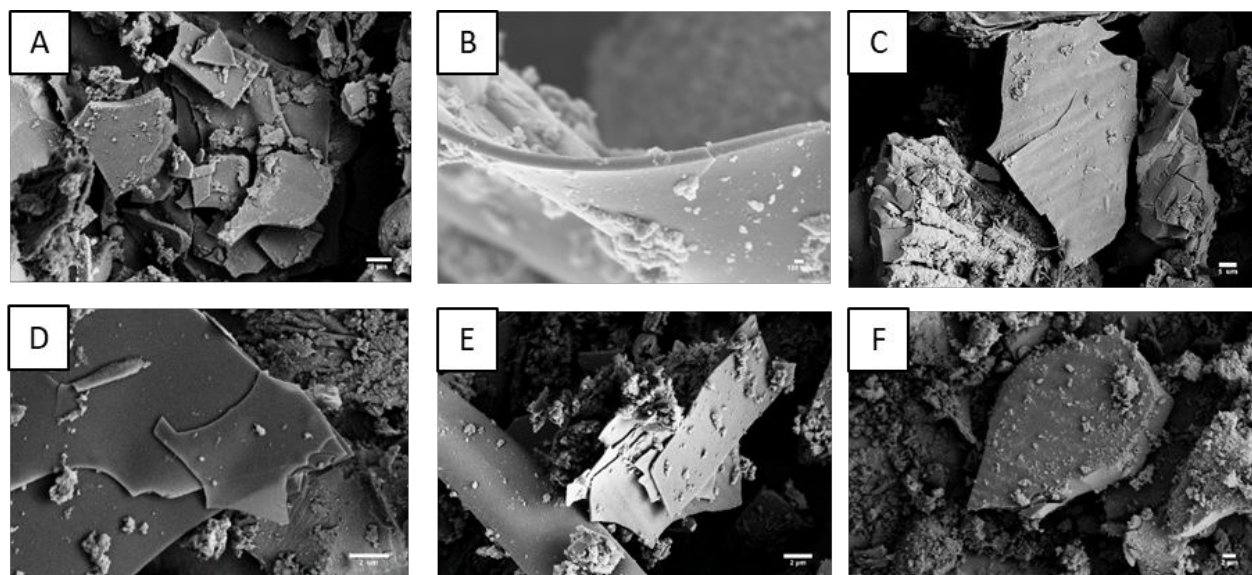

**Figure S4:** SEM images of  $\text{TiO}_2$  synthesized at  $35^\circ\text{C}$ , calcined at  $400^\circ\text{C}$  with LiBr/TTIP ratio of 13 and  $\text{H}_2\text{O}/\text{LiBr}$  of 3.25 (A), 3.75 (B), 4 (C), 4.5 (D), 5 (E), 15 (F)

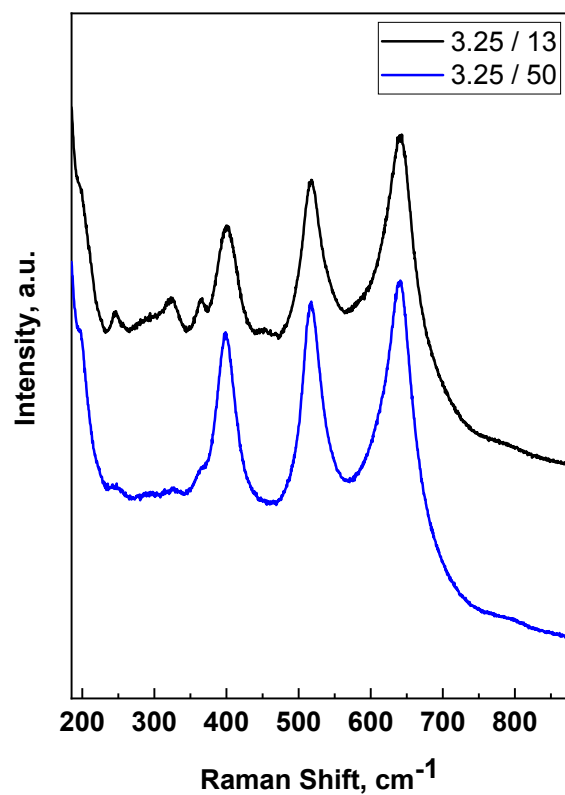

**Figure S5:** Ex-situ Raman spectra of  $\text{TiO}_2$  samples prepared at same  $\text{H}_2\text{O}/\text{LiBr}$  molar ratio equal to 3.25 and different LiBr/TTIP molar ratio.

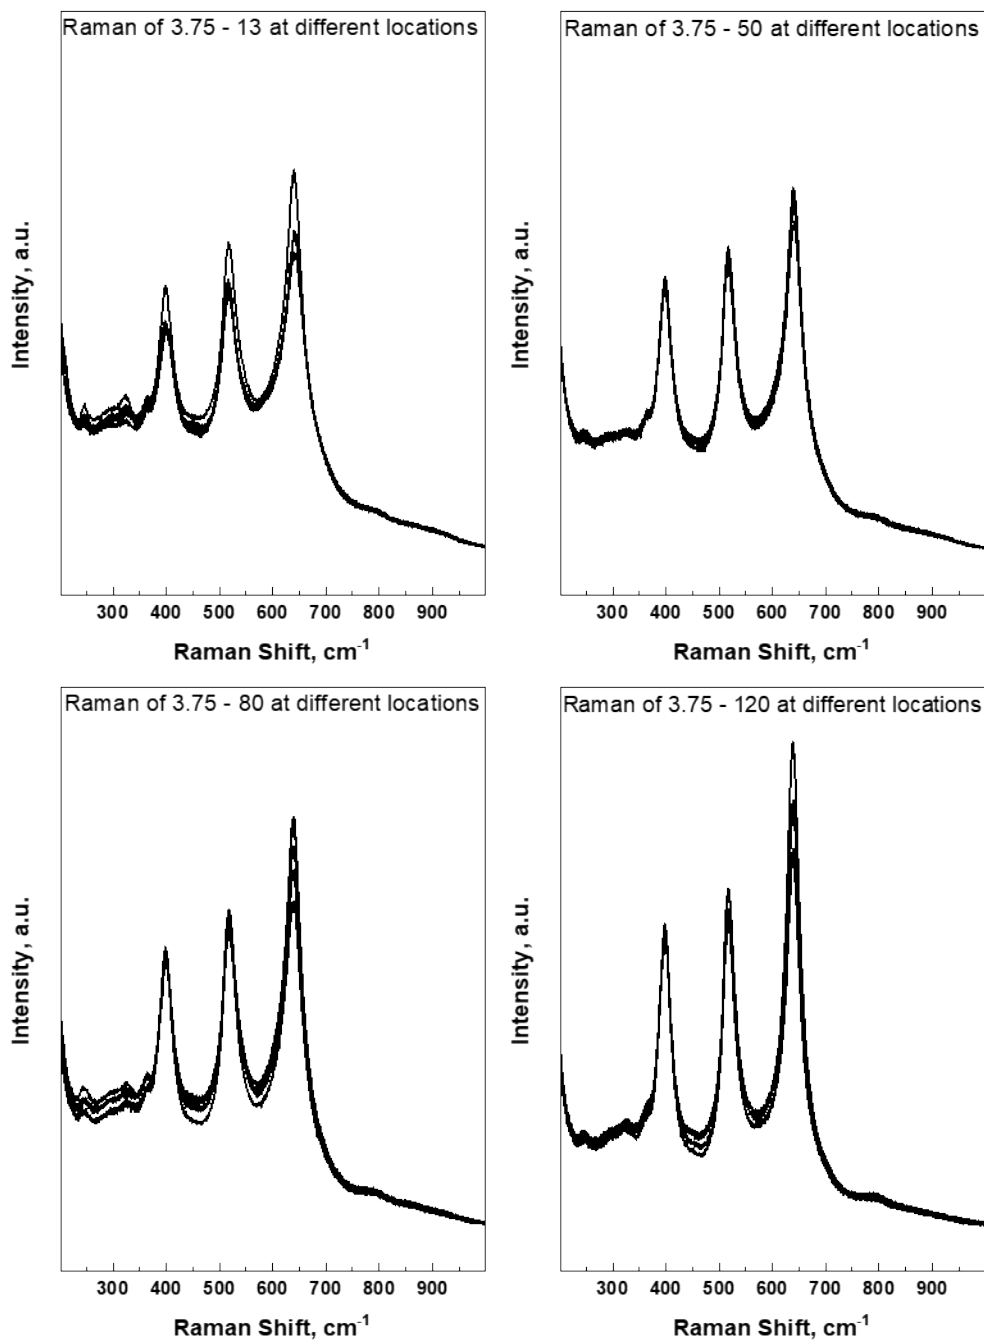

**Figure S 6:** Raman spectra of synthesized TiO<sub>2</sub> at constant 3.75 H<sub>2</sub>O/LiBr ratio and different TTIP/LiBr molar ratio. Each graph shows five different spectra recorded at sampling the synthesized TiO<sub>2</sub> at five distinct locations. Statistical error is presented in Figure 7.



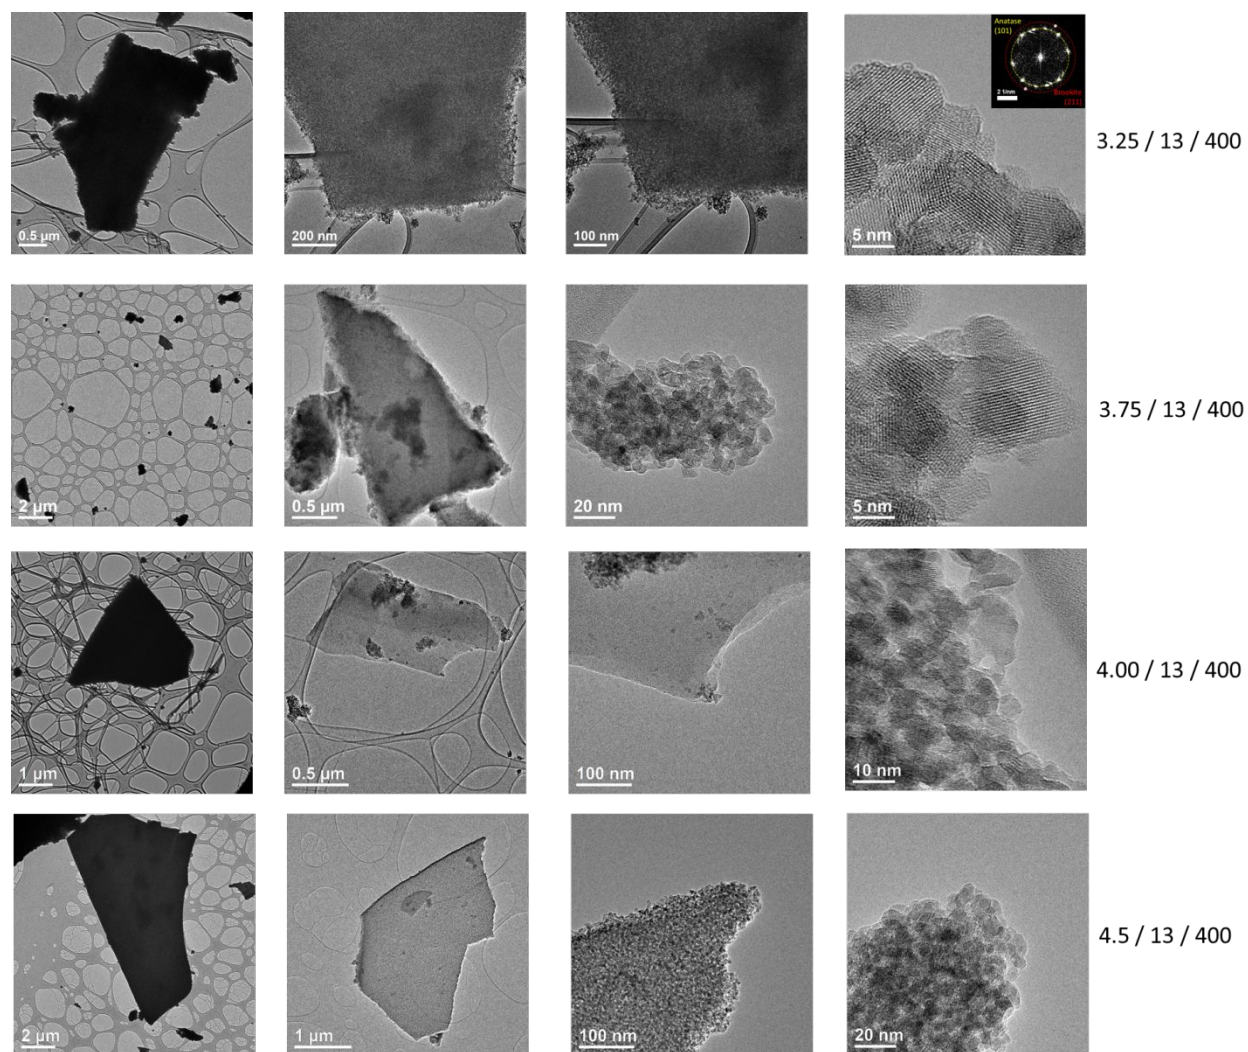

**Figure S7:** TEM images of all the synthesized  $\text{TiO}_2$  flakes at  $\text{H}_2\text{O}/\text{LiBr}$  molar ratio equal to 3.25, 3.75, 4 and 4.5 and  $\text{LiBr}/\text{TTIP}$  equal to 13. The material shown here has been calcined at  $400^\circ\text{C}$ .
